# Supplementary material
Source: PubMed Central journal article supplement (PMC3855667)
Supplement: NIHMS535461-supplement-1_si_001.pdf [file NIHMS535461-supplement-1_si_001.pdf]

## SUPPORTING INFORMATION

### Structure and pH-Induced Structural Rearrangements of the Putative Multidrug Efflux Pump EmrD in Liposomes Probed by Site-directed Spin Labeling

*P. Ryan Steed, Ping Zou, Kristin E. Trone, and Hassane Mchaourab*

Following page:

**FIGURE S1: CW-EPR spectra of spin-labeled positions at pH 5 and pH 7.** Spectra of spin-labeled, reconstituted EmrD at pH 7 (black) and pH 5 (red) are grouped according to location of the labeled position. All spectra have a scan width of 160 G, and amplitude has been normalized to the double integral.

TM 2

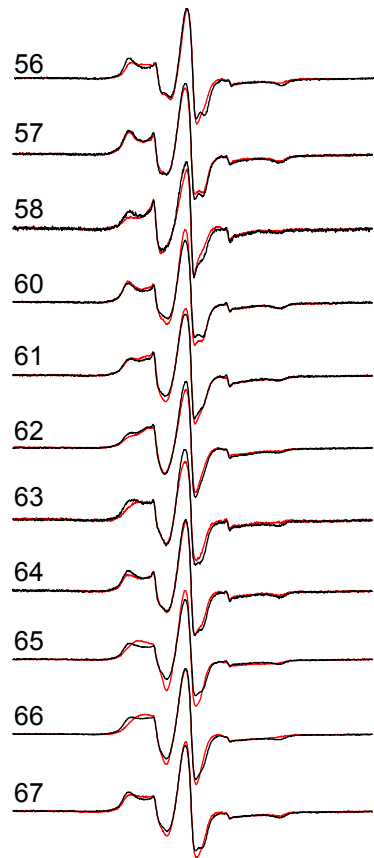

TM 4

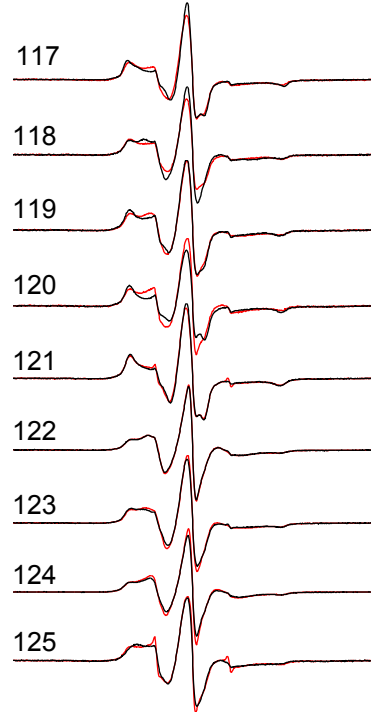

TM 5

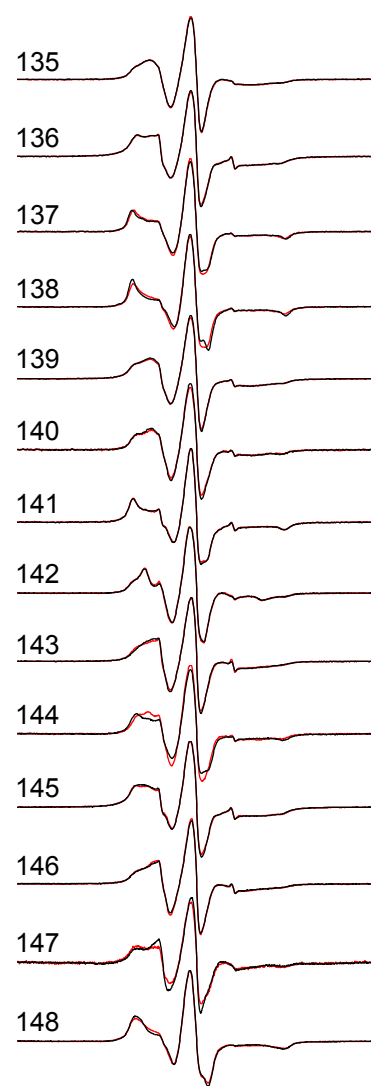

TM 6

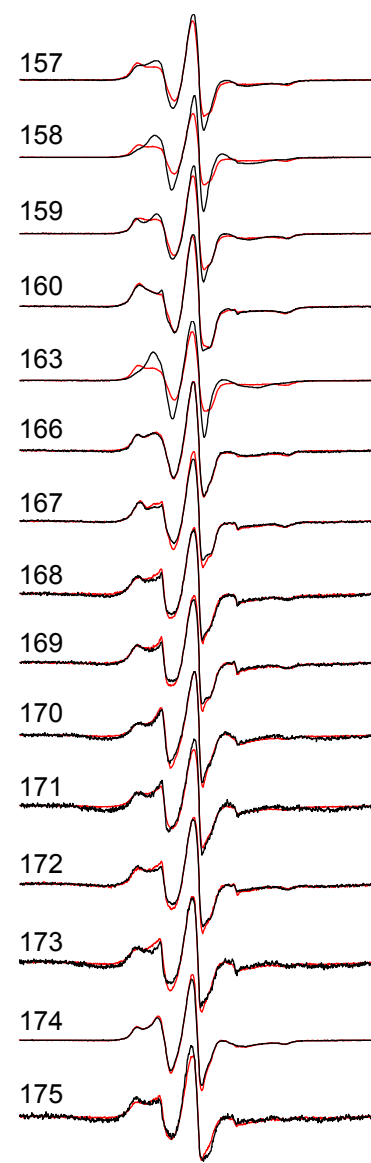

TM 8

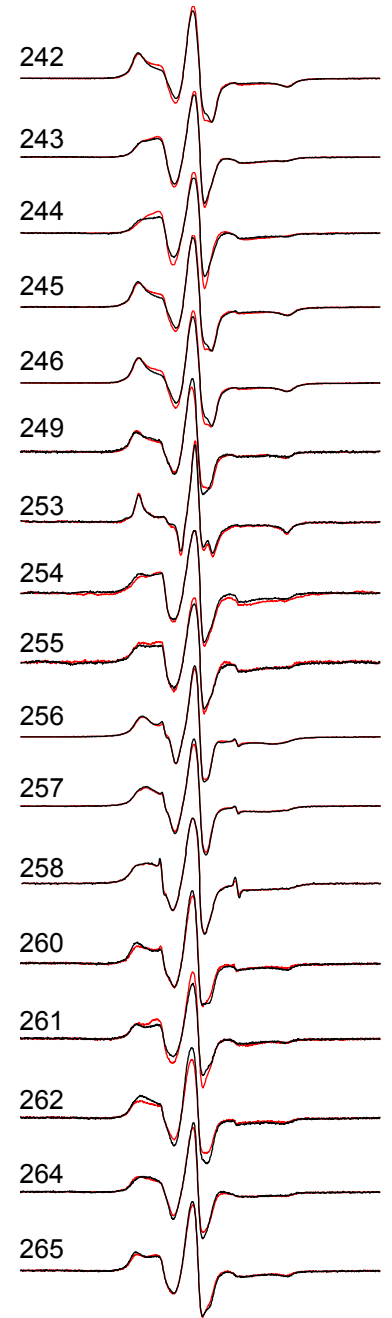

TM 3

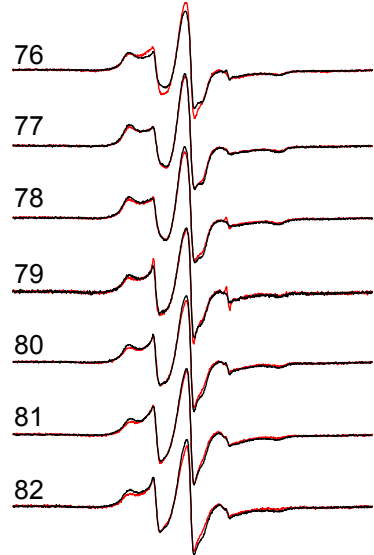

TM 10

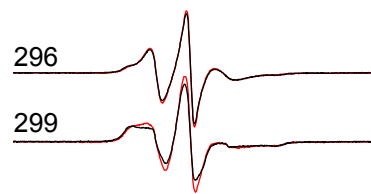

TM 11 - TM12 Loop

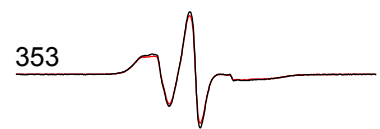

— pH 7  
— pH 5

TABLE S1: Mobility and Accessibility Parameters\*

| Position    | pH 5              |        |                | pH 7              |        |                | Position                                                                                                                              | pH 5              |        |                | pH 7              |        |                |
|-------------|-------------------|--------|----------------|-------------------|--------|----------------|---------------------------------------------------------------------------------------------------------------------------------------|-------------------|--------|----------------|-------------------|--------|----------------|
|             | $\Delta H_0^{-1}$ | $\Pi$  |                | $\Delta H_0^{-1}$ | $\Pi$  |                |                                                                                                                                       | $\Delta H_0^{-1}$ | $\Pi$  |                | $\Delta H_0^{-1}$ | $\Pi$  |                |
|             |                   | NiEDDA | O <sub>2</sub> |                   | NiEDDA | O <sub>2</sub> |                                                                                                                                       |                   | NiEDDA | O <sub>2</sub> |                   | NiEDDA | O <sub>2</sub> |
| <b>TM 2</b> |                   |        |                |                   |        |                | <b>TM 6</b>                                                                                                                           |                   |        |                |                   |        |                |
| 56          | 0.23              | 0.14   | 0.26           | 0.13              | 0.07   | 0.12           | 157                                                                                                                                   | 0.19              | 0.22   | 0.40           | 0.21              | 0.76   | 0.58           |
| 57          | 0.13              | 0.12   | 0.21           | 0.13              | 0.08   | 0.19           | 158                                                                                                                                   | 0.20              | 0.27   | 0.48           | 0.26              | 1.15   | 0.80           |
| 58          | 0.31              | 0.63   | 0.86           | 0.27              | 0.49   | 0.55           | 159                                                                                                                                   | 0.19              | 0.23   | 0.40           | 0.22              | 0.83   | 0.56           |
| 60          | 0.13              | 0.12   | 0.18           | 0.12              | 0.12   | 0.15           | 160                                                                                                                                   | 0.13              | 0.09   | 0.25           | 0.13              | 0.26   | 0.20           |
| 61          | 0.22              | 0.34   | 0.67           | 0.22              | 0.35   | 0.46           | 163                                                                                                                                   | 0.15              | 0.12   | 0.31           | 0.19              | 0.34   | 0.75           |
| 62          | 0.23              | 0.23   | 0.79           | 0.22              | 0.32   | 0.55           | 166                                                                                                                                   | 0.21              | 0.20   | 0.80           | 0.20              | 0.22   | 0.56           |
| 63          | 0.20              | 0.26   | 0.65           | 0.20              | 0.26   | 0.33           | 167                                                                                                                                   | 0.23              | 0.20   | 0.77           | 0.23              | 0.26   | 0.51           |
| 64          | 0.23              | 0.86   | 0.34           | 0.22              | 0.58   | 0.30           | 168                                                                                                                                   | 0.24              | 0.47   | 0.58           | 0.21              | 0.38   | 0.34           |
| 65          | 0.21              | 0.21   | 0.61           | 0.20              | 0.25   | 0.35           | 169                                                                                                                                   | 0.24              | 0.25   | 0.65           | 0.22              | 0.35   | 0.33           |
| 66          | 0.20              | 0.25   | 0.65           | 0.20              | 0.23   | 0.34           | 170                                                                                                                                   | 0.26              | 0.39   | 0.99           | 0.26              | 0.17   | 0.73           |
| 67          | 0.21              | 0.74   | 0.32           | 0.22              | 0.38   | 0.31           | 171                                                                                                                                   | 0.23              | 0.43   | 0.56           | 0.21              | 0.39   | 0.33           |
| <b>TM 3</b> |                   |        |                |                   |        |                | 172                                                                                                                                   | 0.24              | 0.34   | 0.63           | 0.21              | 0.29   | 0.31           |
| 76          | 0.22              | 0.44   | 0.41           | 0.21              | 0.26   | 0.34           | 173                                                                                                                                   | 0.23              | 0.32   | 0.79           | 0.25              | 0.36   | 0.45           |
| 77          | 0.21              | 0.37   | 0.49           | 0.21              | 0.18   | 0.43           | 174                                                                                                                                   | 0.23              | 0.08   | 1.10           | 0.23              | 0.06   | 0.78           |
| 78          | 0.21              | 0.24   | 0.44           | 0.21              | 0.21   | 0.40           | 175                                                                                                                                   | 0.24              | 0.33   | 0.71           | 0.21              | 0.30   | 0.32           |
| 80          | 0.24              | 0.58   | 0.61           | 0.26              | 0.37   | 0.60           | <b>TM 8</b>                                                                                                                           |                   |        |                |                   |        |                |
| 81          | 0.26              | 0.58   | 0.78           | 0.24              | 0.28   | 0.66           | 242                                                                                                                                   | 0.12              | 0.08   | 0.20           | 0.11              | 0.03   | 0.10           |
| 82          | 0.26              | 0.58   | 0.66           | 0.24              | 0.40   | 0.43           | 243                                                                                                                                   | 0.22              | 0.46   | 0.94           | 0.23              | 0.35   | 0.81           |
| <b>TM 4</b> |                   |        |                |                   |        |                | 244                                                                                                                                   | 0.21              | 0.74   | 0.70           | 0.21              | 0.75   | 0.55           |
| 117         | 0.13              | 0.16   | 0.08           | 0.13              | 0.14   | 0.15           | 245                                                                                                                                   | 0.13              | 0.08   | 0.19           | 0.13              | 0.09   | 0.02           |
| 118         | 0.13              | 0.31   | 0.22           | 0.21              | 0.15   | 0.16           | 246                                                                                                                                   | 0.12              | 0.06   | 0.18           | 0.12              | 0.05   | 0.10           |
| 119         | 0.21              | 0.41   | 0.37           | 0.20              | 0.26   | 0.20           | 249                                                                                                                                   | 0.13              | 0.05   | 0.17           | 0.20              | 0.17   | 0.29           |
| 120         | 0.24              | 0.54   | 0.32           | 0.12              | 0.03   | 0.07           | 253                                                                                                                                   | 0.13              | 0.07   | 0.07           | 0.13              | 0.01   | 0.06           |
| 121         | 0.13              | 0.06   | 0.14           | 0.13              | 0.04   | 0.08           | 254                                                                                                                                   | 0.24              | 0.63   | 0.63           | 0.24              | 0.38   | 0.47           |
| 122         | 0.30              | 2.14   | 0.43           | 0.29              | 2.70   | 0.40           | 255                                                                                                                                   | 0.22              | 0.40   | 0.61           | 0.23              | 0.30   | 0.43           |
| 123         | 0.23              | 0.80   | 0.38           | 0.22              | 0.67   | 0.29           | 256                                                                                                                                   | 0.23              | 0.13   | 0.18           | 0.23              | 0.16   | 0.23           |
| 124         | 0.28              | 3.39   | 0.44           | 0.26              | 3.35   | 0.38           | 257                                                                                                                                   | 0.18              | 0.18   | 0.35           | 0.19              | 0.32   | 0.64           |
| 125         | 0.22              | 0.58   | 0.39           | 0.22              | 0.93   | 0.27           | 258                                                                                                                                   | 0.20              | 0.10   | 1.23           | 0.21              | 0.13   | 0.82           |
| <b>TM 5</b> |                   |        |                |                   |        |                | 260                                                                                                                                   | 0.16              | 0.17   | 0.30           | 0.16              | 0.19   | 0.22           |
| 135         | 0.21              | 0.41   | 0.39           | 0.23              | 0.55   | 0.45           | 261                                                                                                                                   | 0.21              | 0.31   | 0.48           | 0.21              | 0.31   | 0.42           |
| 136         | 0.20              | 0.31   | 0.41           | 0.18              | 0.45   | 0.30           | 262                                                                                                                                   | 0.13              | 0.11   | 0.36           | 0.14              | 0.06   | 0.43           |
| 137         | 0.14              | 0.07   | 0.10           | 0.17              | 0.14   | 0.11           | 264                                                                                                                                   | 0.22              | 0.74   | 0.39           | 0.24              | 1.45   | 0.42           |
| 138         | 0.20              | 0.12   | 0.21           | 0.12              | 0.03   | 0.08           | 265                                                                                                                                   | 0.22              | 0.48   | 0.48           | 0.22              | 0.37   | 0.37           |
| 139         | 0.21              | 0.43   | 0.52           | 0.21              | 0.46   | 0.56           | <b>TM 10, 11-12 Loop</b>                                                                                                              |                   |        |                |                   |        |                |
| 140         | 0.20              | 0.10   | 0.57           | 0.20              | 0.04   | 0.65           | 296                                                                                                                                   | 0.26              | 1.05   | 0.94           | 0.26              | 0.93   | 0.79           |
| 141         | 0.22              | 0.18   | 0.19           | 0.22              | 0.16   | 0.18           | 299                                                                                                                                   | 0.20              | 0.46   | 0.68           | 0.20              | 0.31   | 0.52           |
| 142         | 0.16              | 0.06   | 0.09           | 0.17              | 0.06   | 0.08           | 353                                                                                                                                   | 0.22              | 0.23   | 0.77           | 0.23              | 0.36   | 0.61           |
| 143         | 0.23              | 0.21   | 0.58           | 0.22              | -0.01  | 0.53           | * Mobility ( $\Delta H_0^{-1}$ ) and accessibility ( $\Pi$ ) parameters are calculated as described in Refs. 27 and 28, respectively. |                   |        |                |                   |        |                |
| 144         | 0.20              | 0.08   | 0.68           | 0.21              | 0.07   | 0.35           |                                                                                                                                       |                   |        |                |                   |        |                |
| 145         | 0.18              | 0.13   | 0.18           | 0.18              | 0.14   | 0.17           |                                                                                                                                       |                   |        |                |                   |        |                |
| 146         | 0.23              | 0.19   | 0.82           | 0.21              | 0.16   | 0.53           |                                                                                                                                       |                   |        |                |                   |        |                |
| 147         | 0.23              | 0.27   | 0.37           | 0.24              | 0.21   | 0.48           |                                                                                                                                       |                   |        |                |                   |        |                |
| 148         | 0.12              | 0.09   | 0.17           | 0.13              | 0.05   | 0.23           |                                                                                                                                       |                   |        |                |                   |        |                |
